# Supplementary material for: Fractioning of Proanthocyanidins of Uncaria tomentosa. Composition and Structure-Bioactivity Relationship
Source: PubMed Central journal article supplement (PMC5618088; doi:10.3390/antiox6030060), 2017-07-28
Supplement: antioxidants-06-00060-s001.pdf [file antioxidants-06-00060-s001.pdf]

Supplementary Material

Table S1. MS/MS parameters for the identified polyphenols.

| Compound                 | MRM Transition (m/z) | Collision Energy (V) | Cone Voltage (V) |
|--------------------------|----------------------|----------------------|------------------|
| Benzoic acid             | 121 > 77             | 12                   | 27               |
| Salicylic acid           | 137 > 93             | 17                   | 27               |
| 4-Hydroxybenzoic acid    | 137 > 93             | 12                   | 27               |
| Protocatechuic acid      | 153 > 109            | 12                   | 30               |
| Gallic acid              | 169 > 125            | 15                   | 33               |
| Vanillic acid            | 167 > 152            | 12                   | 30               |
| Syringic acid            | 197 > 182            | 12                   | 30               |
| <i>p</i> -Coumaric acid  | 163 > 119            | 14                   | 30               |
| Caffeic acid             | 179 > 135            | 16                   | 35               |
| Ferulic acid             | 193 > 134            | 16                   | 30               |
| Isoferulic acid          | 193 > 134            | 14                   | 27               |
| (+)-Catechin             | 289 > 245            | 16                   | 40               |
| (-)-Epicatechin          | 289 > 245            | 14                   | 38               |
| Procyanidin dimers       | 577 > 289            | 25                   | 45               |
| Procyanidin trimers      | 865 > 577            | 25                   | 50               |
| Propelargonidin dimers   | 561 > 289            | 25                   | 45               |
| Flavalignans-cinchonains | 451 > 341            | 25                   | 45               |

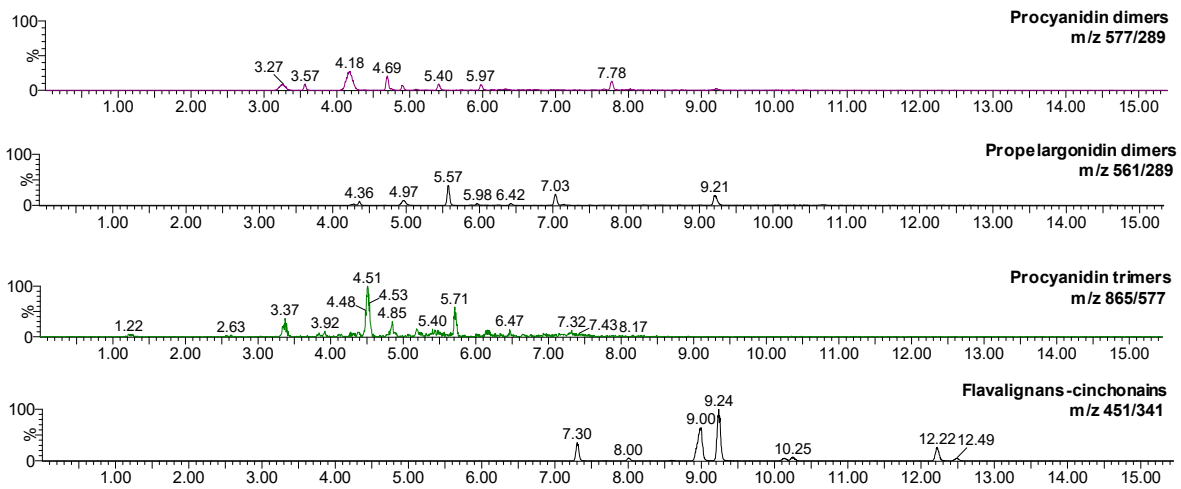

Figure S1. MRM chromatograms (UPLC-DAD-ESI-TQ-MS) for proanthocyanidins in *U. tomentosa* leaves fractions.

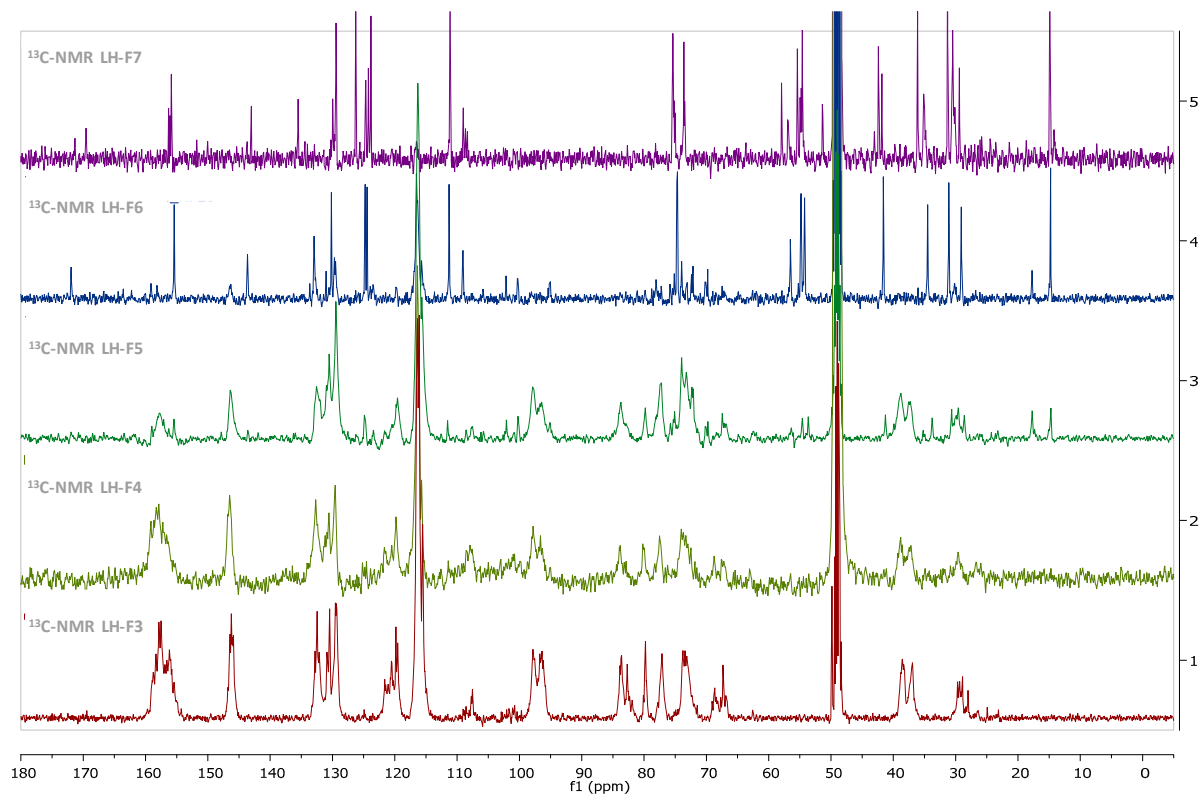

Figure S2.  $^{13}\text{C}$ -NMR (MeOD) for polyphenolic fractions LH-F3 a LH-F7 from *U. tomentosa* leaves

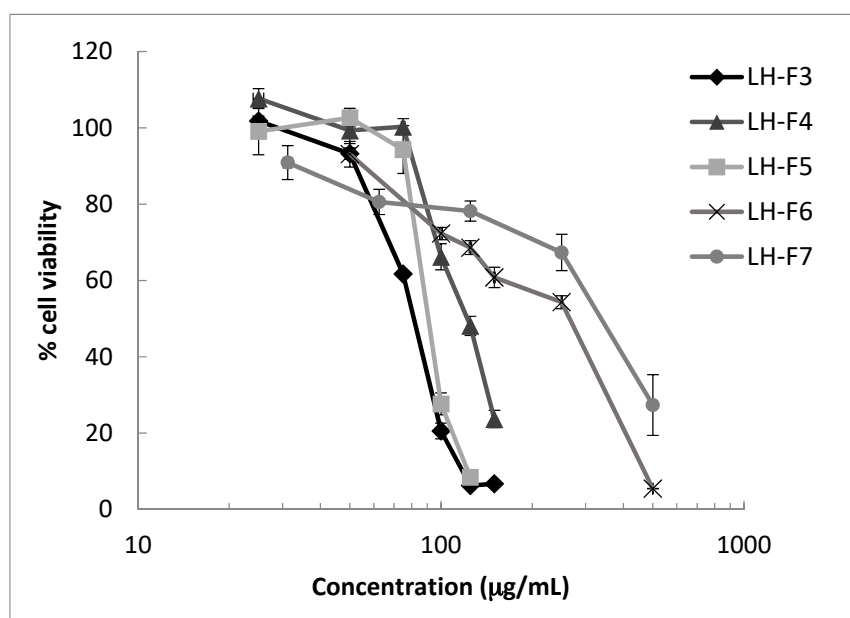

Figure S3. Dose-response curves of cytotoxicity of *U. tomentosa* fractions on AGS gastric adenocarcinoma<sup>1</sup>.

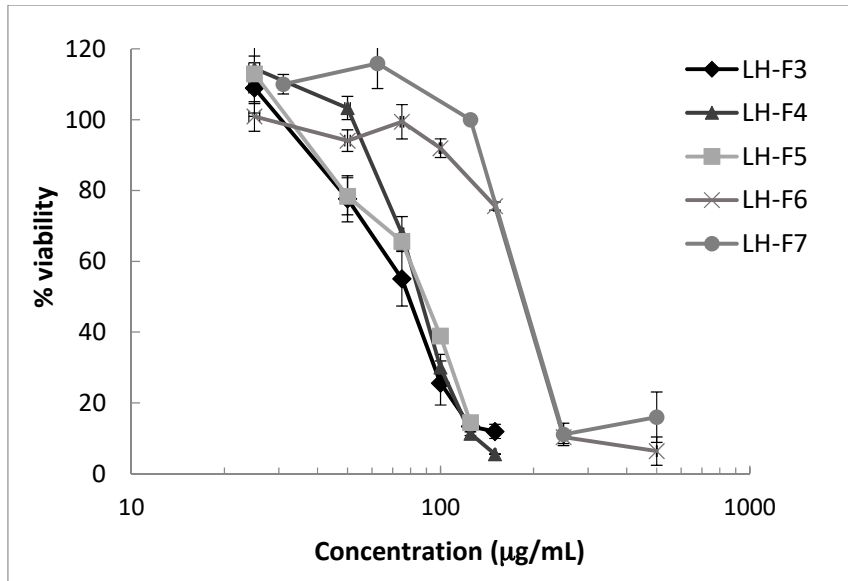

**Figure S4.** Dose-response curves of cytotoxicity of *U. tomentosa* fractions on SW620 colon adenocarcinoma<sup>1</sup>.  
<sup>1</sup>Results represent the mean  $\pm$  SE of triplicates of one representative experiment of each fraction.
